# Supplementary material for: Formic acid generating in situ H2 and CO2 for nitrite reduction in the aqueous phase
Source: Royal Society of Chemistry journal article supplement (doi:10.1039/d1cy01448j), 2022-01-01
Supplement: d1cy01448j1.pdf [file d1cy01448j1.pdf]

# Formic acid generating *in-situ* H<sub>2</sub> and CO<sub>2</sub> for nitrite reduction in aqueous phase

## Supporting information

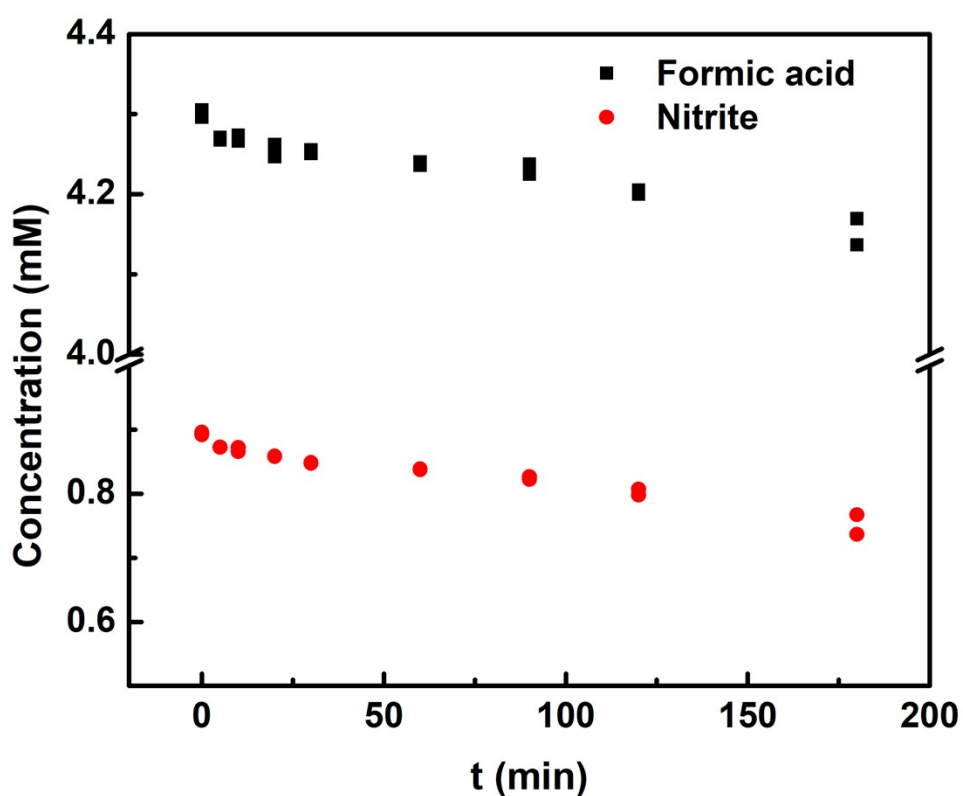

Figure S1. Concentration profile of formic-acid, nitrite under inert-flow-through mode at pH 5 condition (100 mg 0.9 wt% catalyst, 5 mM formic-acid solution, 1 mM nitrite).

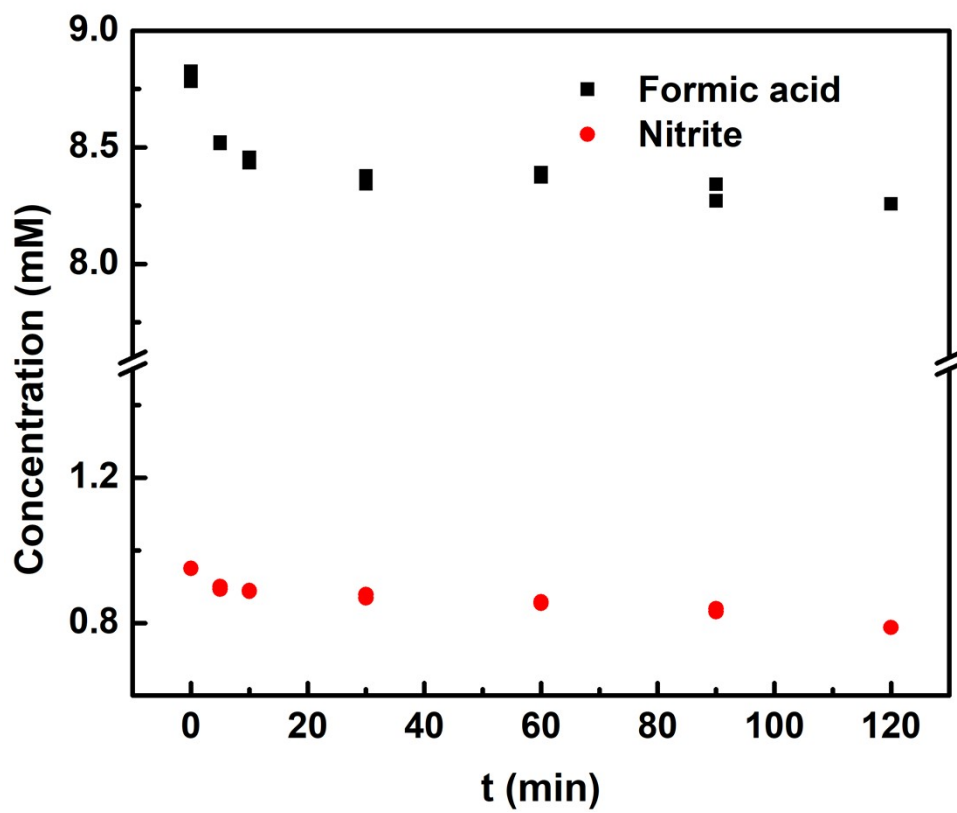

Figure S2. Concentration profile of formic-acid, nitrite under inert-flow-through mode at pH 5 condition 100 mg 0.9 wt% catalyst, 10 mM formic-acid solution, 1 mM nitrite).

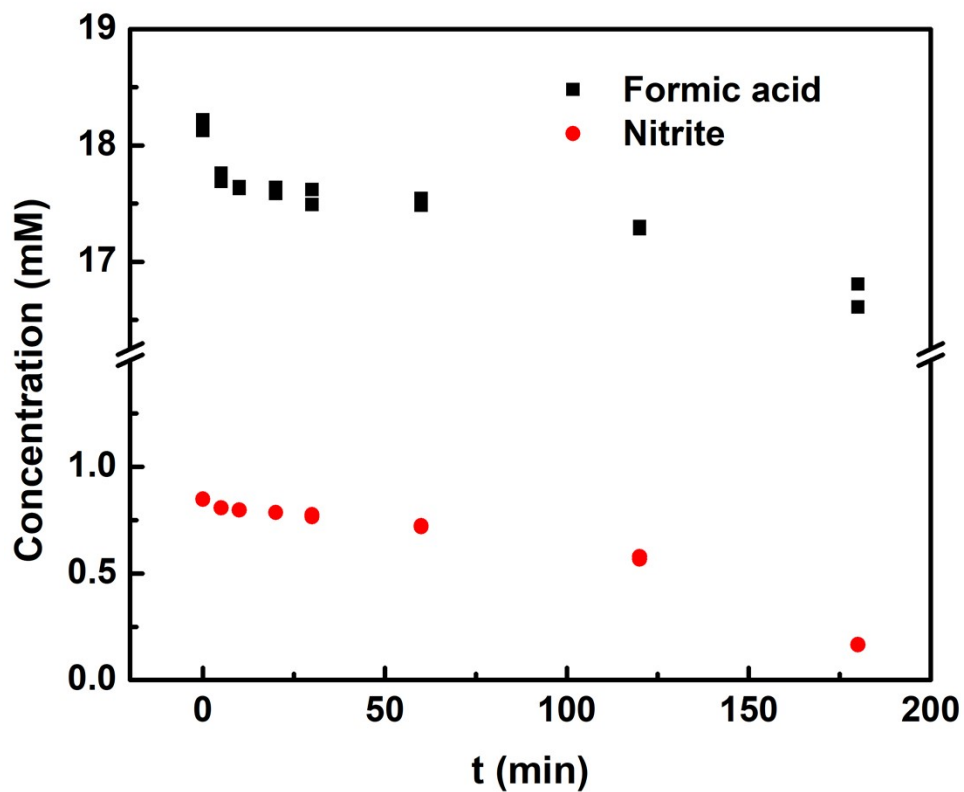

Figure S3. Concentration profile of formic-acid, nitrite under inert-flow-through mode at pH 5 condition 100 mg 0.9 wt% catalyst, 20 mM formic-acid solution, 1 mM nitrite).

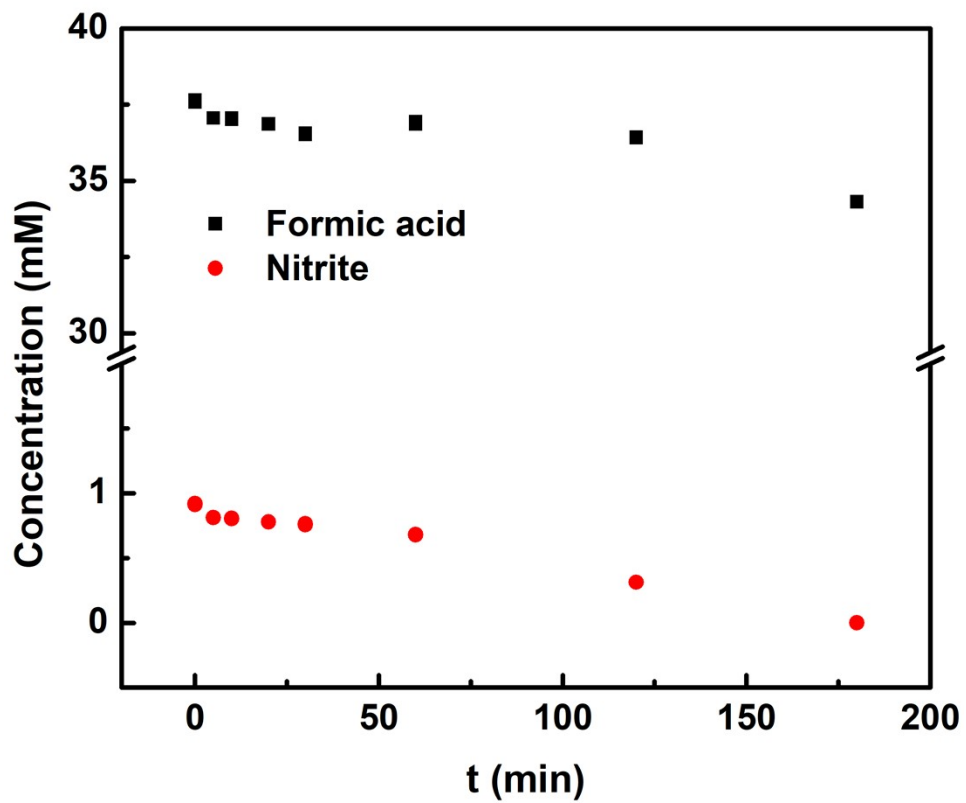

Figure S4. Concentration profile of formic-acid, nitrite under inert-flow-through mode at pH 5 condition 100 mg 0.9 wt% catalyst, 40 mM formic-acid solution, 1 mM nitrite).

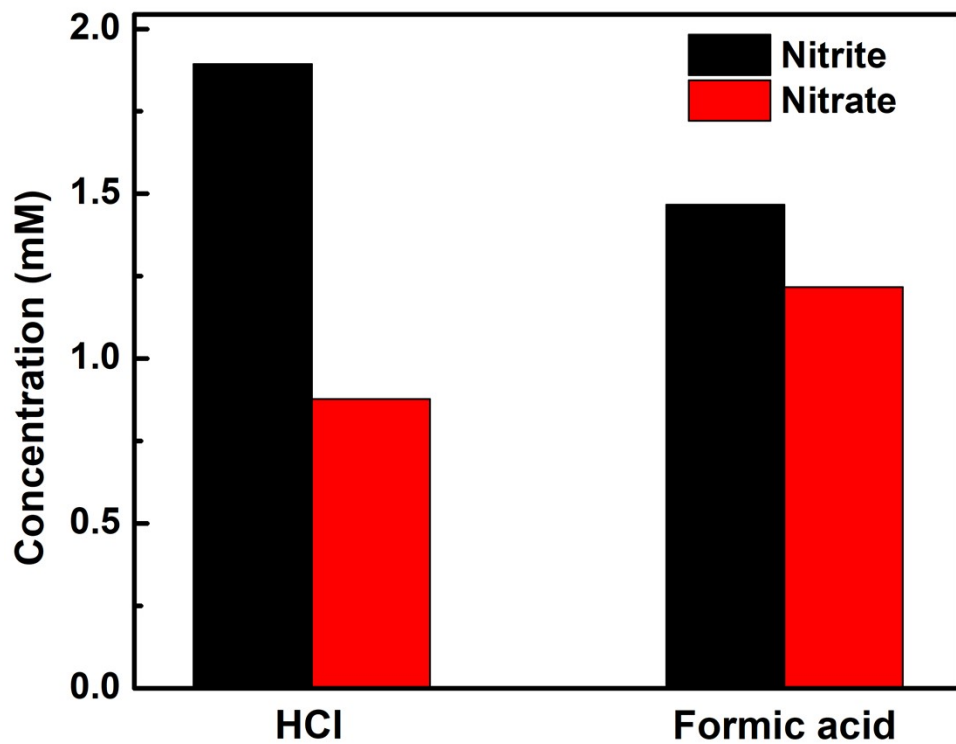

Figure S5. HCl (left bar), formic-acid (pH=3) (right bar) reacts with nitrite forming nitrate under ambient-batch mode, respectively (10 mM formic-acid, 10 mM HCl, 3 mM nitrite).

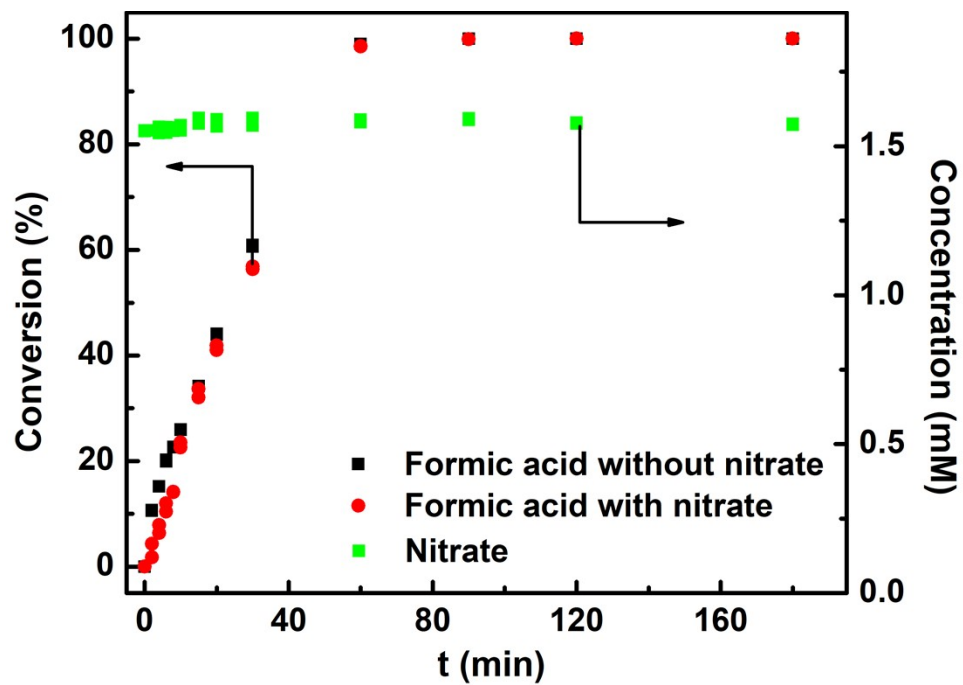

Figure S6. Formic-acid decomposition ( $\text{pH} = 3$ ) experiments was performed under ambient-batch mode in presence of 0 mM and 1.5 mM nitrate, respectively,

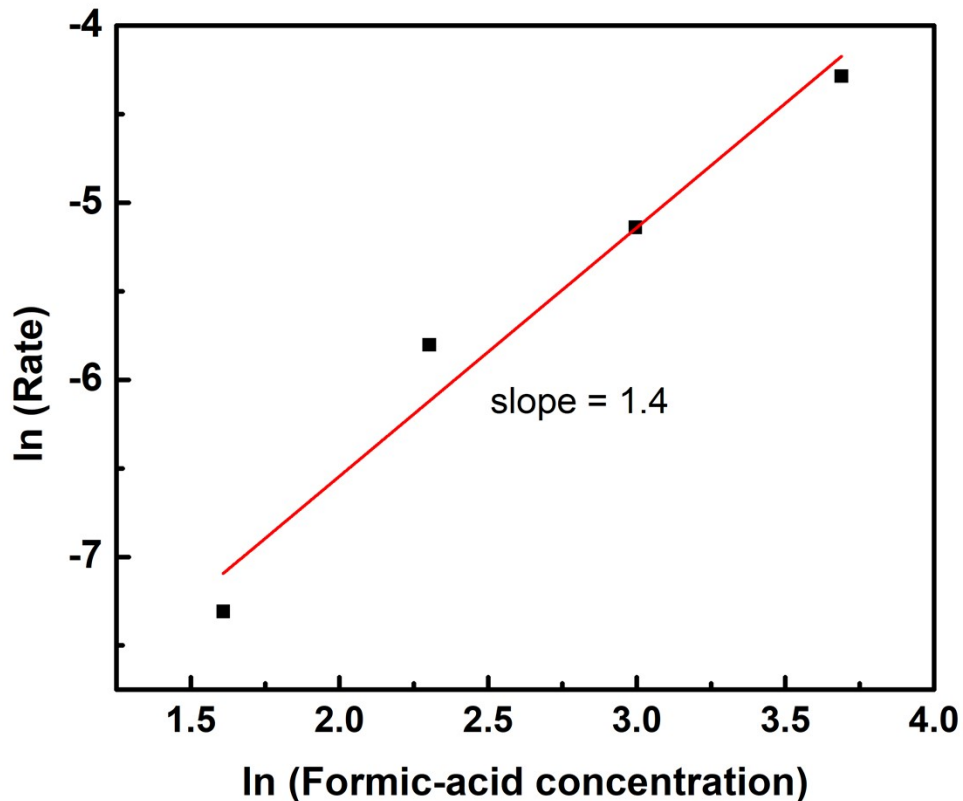

Figure S7. Effect of the initial formic-acid concentration on the formic-acid decomposition rate.

## 1. Calculation the nitrite reduction rate in batch and ATR experiments

### 1.1. Batch experiment

The reaction rate was estimated based on a the batch experiment at pH 5 (1 mM nitrite, 20 mM formic-acid, 100 mg catalyst, 50 ml/min He flow through). As shown in Table 4, nitrite conversion after 2 hours is 33 %, resulting in an averaged rate:

$$\text{average rate} = \frac{\text{converted nitrite}}{\text{reaction time}} = \frac{1 \text{ mM} * 0.33 * 0.3 \text{ L}}{120 \text{ min}} = 8.25 * 10^{-7} \text{ mol/min}$$

Amount of surface Pd (mol) is calculated based on the dispersion by:

$$n_{Pd} = \frac{\text{mass of catalyst} * \text{loading of Pd} * \text{dispersion of Pd}}{\text{molecular weight of Pd}} = \frac{100 \text{ mg} * 0.05}{106.42} = 4.7 * 10^{-6} \text{ mol}$$

Apparent TOF is calculated by:

$$\text{apparent TOF} = \frac{\text{average rate}}{n_{Pd}} = \frac{8.25 * 10^{-7} \text{ mol/min}}{4.7 * 10^{-6} \text{ mol}} = 0.18 \text{ min}^{-1}$$

## 1.2. ATR experiment

The ATR reaction rate is estimated based on the results shown Figure 6b, observing disappearance of the free nitrite peak within 38 min. The reaction volume is the volume of the ATR cell, estimated as 0.4 mL based on the dimension of the cell. The average reaction rate is estimated according:

$$\text{average rate} = \frac{\text{nitrite concentration in the ATR cell}}{\text{reaction time}} = \frac{10 \text{ mM} * 0.4 \text{ mL}}{38 \text{ min}} = 1 * 10^{-7} \text{ mol/min}$$

Amount of the surface Pd (mol) based on the dispersion of Pd is calculated by:

$$n_{Pd} = \frac{\text{mass of catalyst} * \text{loading of Pd} * \text{dispersion of Pd}}{\text{molecular weight of Pd}} = \frac{5 \text{ mg} * 0.05}{106.42} = 5.1 * 10^{-7} \text{ mol}$$

Apparent TOF is calculated by:

$$\text{apparent TOF} = \frac{\text{average rate}}{n_{Pd}} = \frac{1 * 10^{-7} \text{ mol/min}}{5.1 * 10^{-7} \text{ mol}} = 0.19 \text{ min}^{-1}$$

Therefore the rate observed in both experiments are remarkably similar.
